# Supplementary material for: PdAg nanoparticles and aminopolymer confined within mesoporous hollow carbon spheres as an efficient catalyst for hydrogenation of CO2 to formate
Source: Royal Society of Chemistry journal article supplement (doi:10.1039/c9ta13389e), 2020-01-01
Supplement: c9ta13389e1.pdf [file c9ta13389e1.pdf]

# Electronic Supplementary Information

PdAg nanoparticles and aminopolymer  
confined within mesoporous hollow carbon  
spheres as an efficient catalyst for  
hydrogenation of CO<sub>2</sub> to formate

*Guoxiang Yang,<sup>a</sup> Yasutaka Kuwahara,<sup>abc</sup> Shinya Masuda,<sup>a</sup> Kohsuke Mori,<sup>ab</sup> Catherine  
Louis,<sup>d</sup> and Hiromi Yamashita<sup>\*ab</sup>*

<sup>a</sup> Division of Materials and Manufacturing Science, Graduate School of Engineering,  
Osaka University, 2-1 Yamada-oka, Suita, Osaka 565-0871, Japan

<sup>b</sup> Unit of Elements Strategy Initiative for Catalysts & Batteries (ESICB), Kyoto  
University, Katsura, Kyoto 615-8520, Japan

<sup>c</sup> JST, PRESTO, 4-1-8 Honcho, Kawaguchi, Saitama 332-0012, Japan

<sup>d</sup> Sorbonne Universités, UPMC Univ Paris 06, UMR CNRS 7197, Laboratoire de  
Réactivité de Surface, 4 Place Jussieu, Tour 43-33, 3ème étage, Case 178, F-75252  
Paris, France

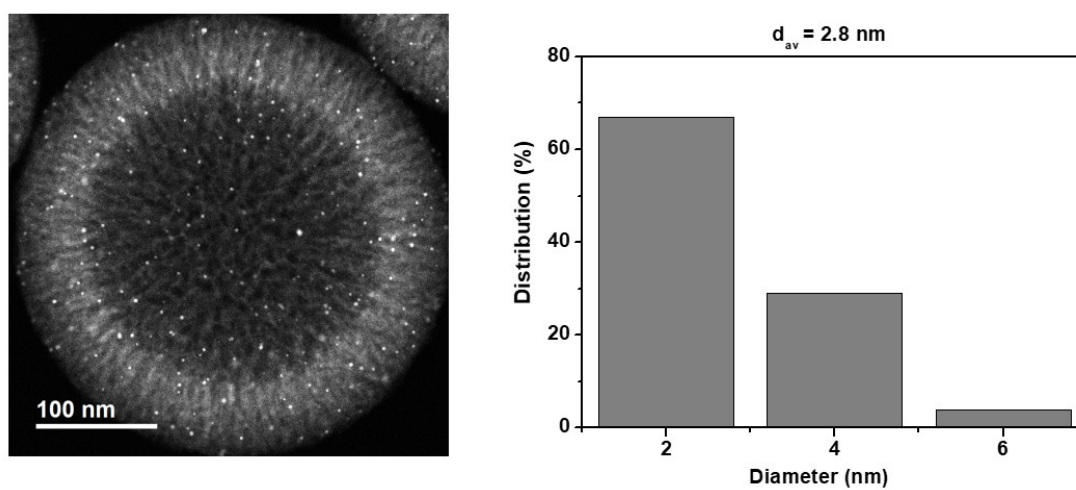

**Figure S1.** Particle size distribution for STEM images of Pd<sub>2</sub>Ag<sub>8</sub>@MHCS.

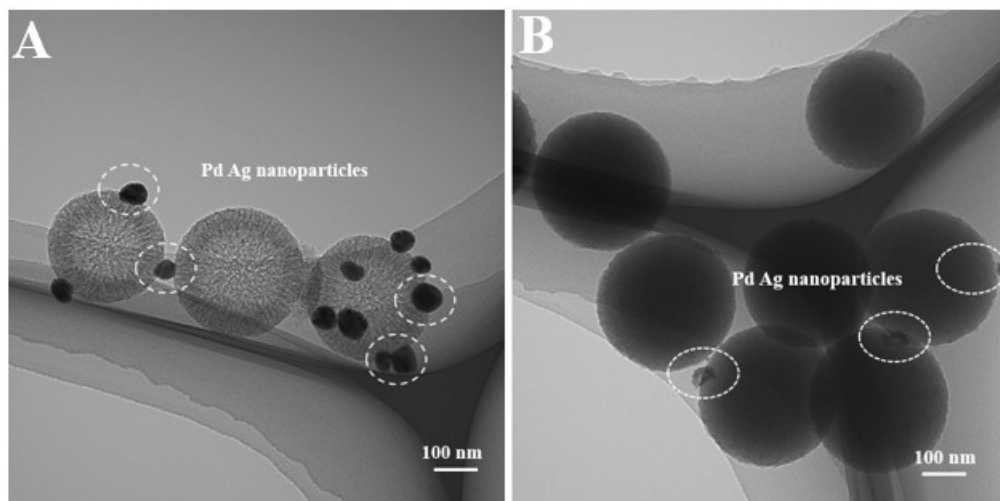

**Figure S2.** TEM images of (A)  $\text{Pd}_2\text{Ag}_8@\text{MHCS}$ , (B)  $\text{Pd}_2\text{Ag}_8\text{-P}@\text{MHCS}$  without removal  $\text{SiO}_2$ .

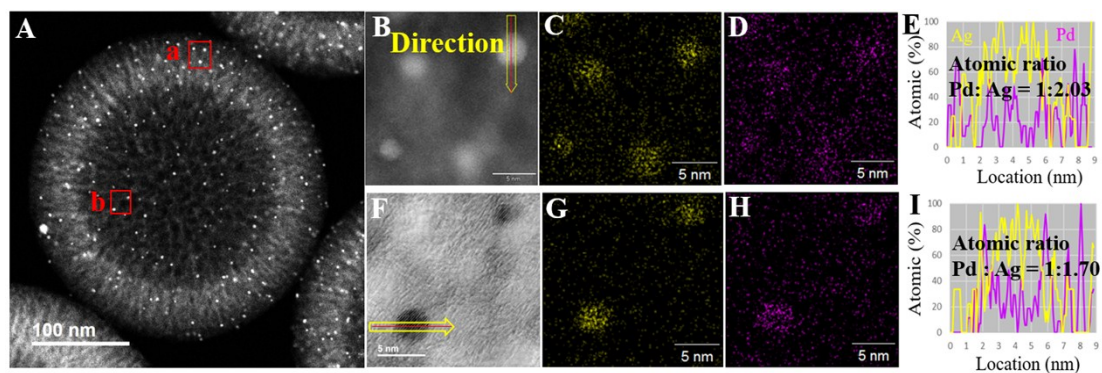

**Figure S3.** (A) STEM image of Pd<sub>2</sub>Ag<sub>8</sub>-P@MHCS, (B) STEM image of enlarged picture of the a zone red frame in Figure S2 (A), (C-D) the corresponding STEM elemental maps of (C) Ag, (D) Pd of PdAg alloy nanoparticles, (E) STEM elemental line scan across the PdAg alloy nanoparticles in (B), (F) STEM image of enlarged picture of the b zone red frame in Figure S2 (A), (G-H) the corresponding STEM elemental maps of (G) Ag (H) Pd of PdAg alloy nanoparticles, (E) STEM elemental line scan across the PdAg alloy nanoparticles in (F).

**Table S1.** The XRD size of Pd<sub>2</sub>Ag<sub>8</sub>-P@MHCS and Ag-P@MHCS.

| Sample                                  | Ag content [wt%] | XRD size [nm] |
|-----------------------------------------|------------------|---------------|
| Pd <sub>2</sub> Ag <sub>8</sub> -P@MHCS | 4                | 37.8          |
| Ag-P@MHCS                               | 4                | 39.2          |

**Table S2.** Table 1. BET surface Area ( $S_{\text{BET}}$ ), Total Pore Volume ( $V_p$ ), Average Mesopore Diameter ( $D_{\text{ave}}$ ) of different catalysts.

| catalysts     | $S_{\text{BET}}$ [ $\text{m}^2\text{g}^{-1}$ ] | $V_p$ [ $\text{cm}^3\text{g}^{-1}$ ] | $D_{\text{ave}}$ [nm] |
|---------------|------------------------------------------------|--------------------------------------|-----------------------|
| MHCS          | 1269                                           | 3.1                                  | 7.1                   |
| P@MHCS        | 814                                            | 1.4                                  | 5.5                   |
| Ag-P@MHCS     | 633                                            | 1.4                                  | 4.8                   |
| Pd-P@MHCS     | 619                                            | 1.4                                  | 4.8                   |
| Pd2Ag8-P@MHCS | 666                                            | 1.5                                  | 4.8                   |

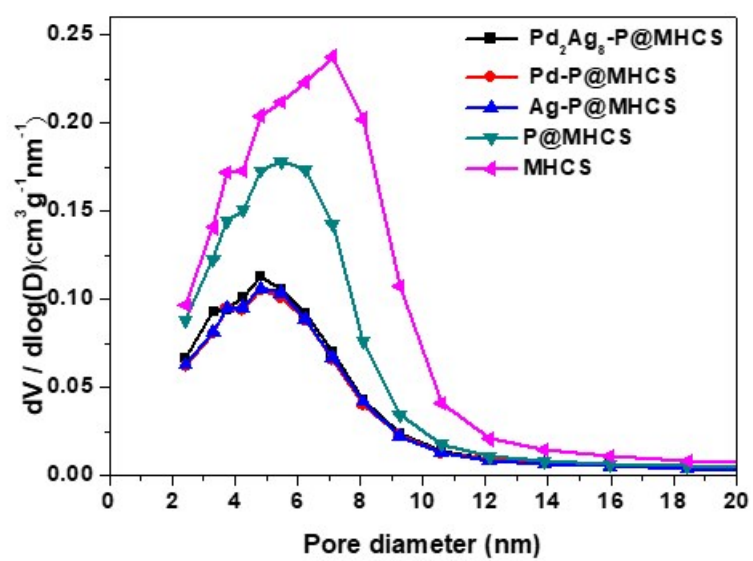

**Figure S4.** mesopore size distribution of Pd<sub>2</sub>Ag<sub>8</sub>-P@MHCS, Pd-P@MHCS, Ag-P@MHCS, P@MHCS and MHCS.

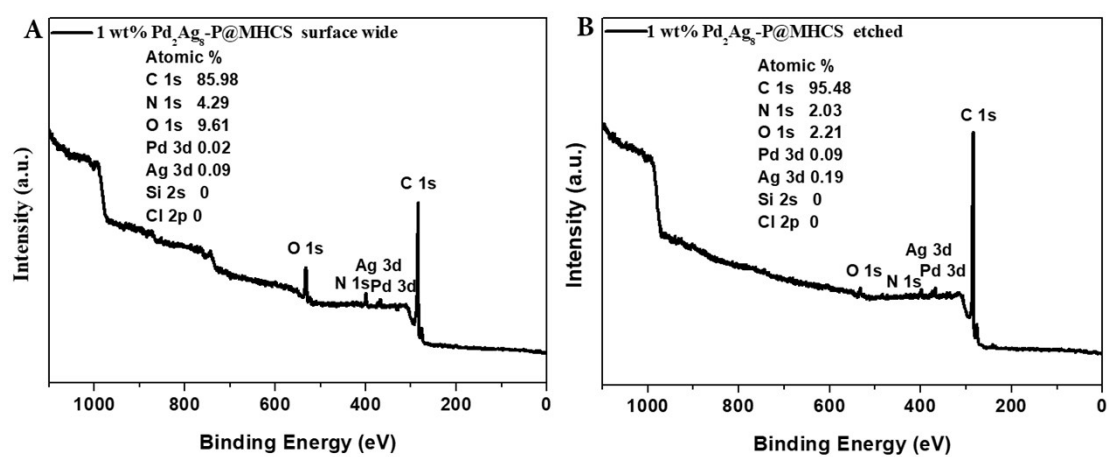

**Figure S5.** Survey spectrum of Pd<sub>2</sub>Ag<sub>8</sub>-P@MHCS (A) surface wide and (B) etched.



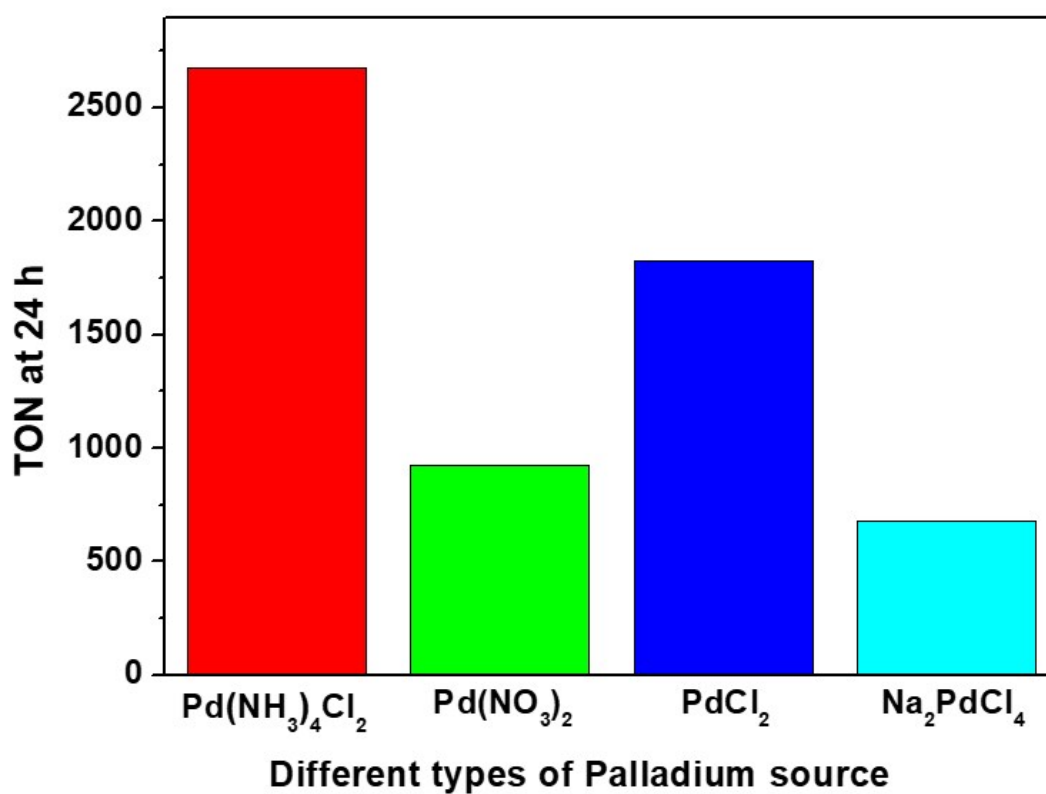

**Figure S6.** Effect of different types of Palladium source of  $\text{Pd}_2\text{Ag}_8\text{-P@MHCS}$ , Pd theoretical weight was 1 wt%, PdAg alloy mole ratio (Pd: Ag = 2:8) were prepared at different types of Pd source with  $\text{AgNO}_3$ . Reaction conditions: catalyst (10 mg), 1.0 M aqueous  $\text{NaHCO}_3$  solution (15 mL),  $\text{H}_2/\text{CO}_2$  (1:1), total 2.0 MPa, 24 h.

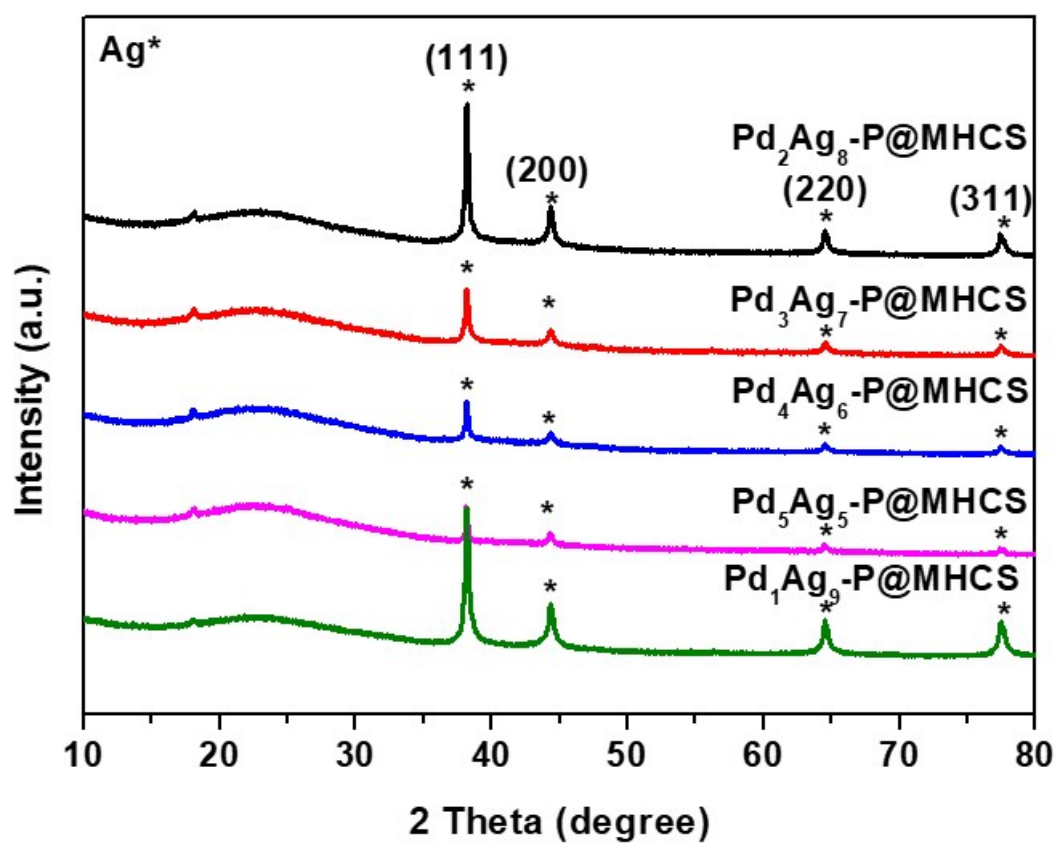

**Figure S7.** Powder XRD patterns of different molar ratio of PdAg-P@MHCS (Pd weight was 1 wt%).

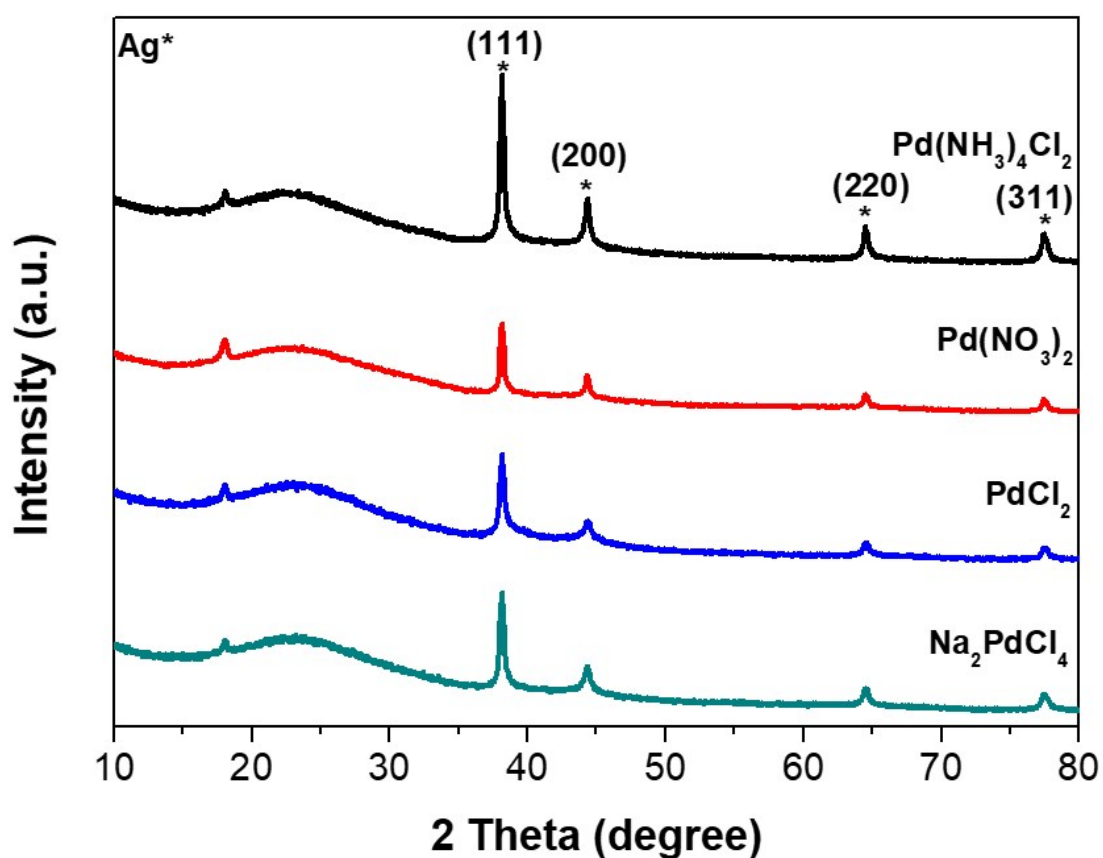

**Figure S8.** Powder XRD patterns of different types of Pd source of Pd<sub>2</sub>Ag<sub>8</sub>-P@MHCS (Pd weight was 1 wt%). Pd theoretical weight was 1 wt%, PdAg alloy mole ratio (Pd: Ag = 2:8) were prepared at different types of Pd source with AgNO<sub>3</sub>.

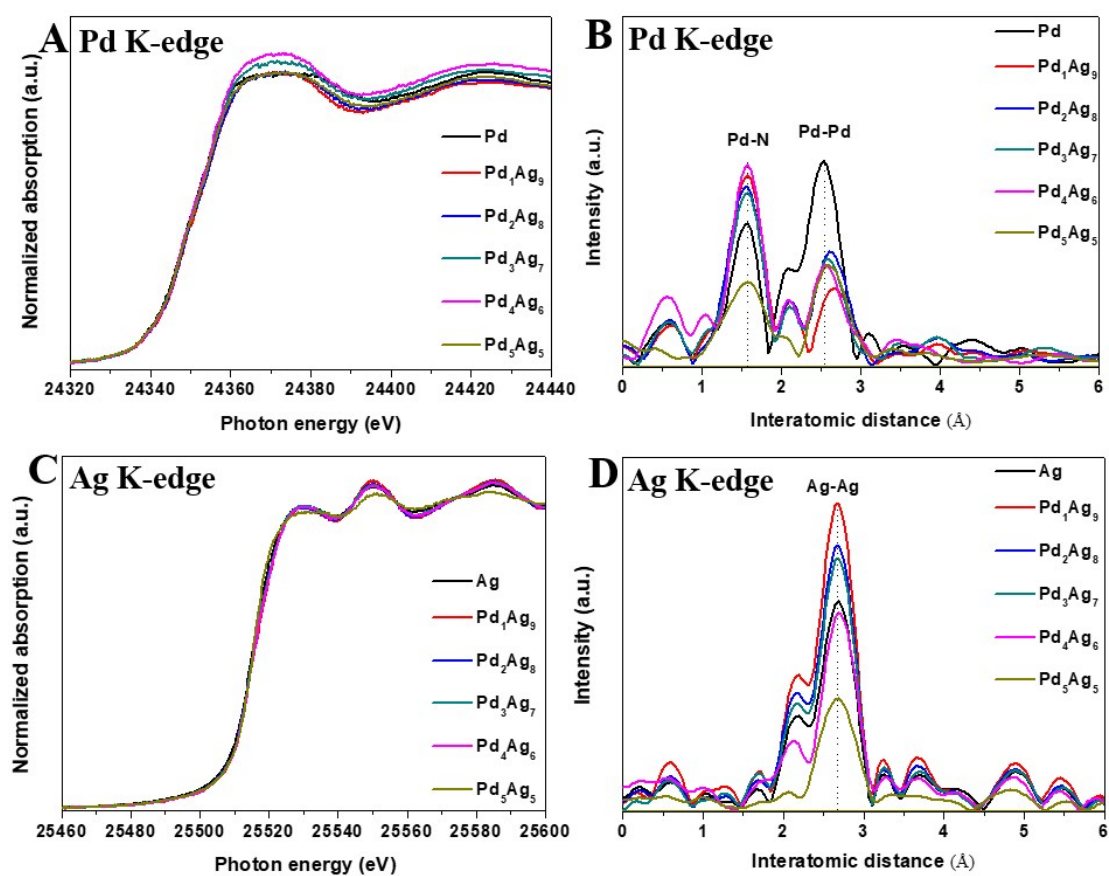

**Figure S9.** (A) XANES of Pd K-edge (B) Pd K-edge Fourier transforms EXAFS (C) XANES of Ag K-edge and (D) Ag K-edge EXAFS for different molar ratio of PdAg-P@MHCS.

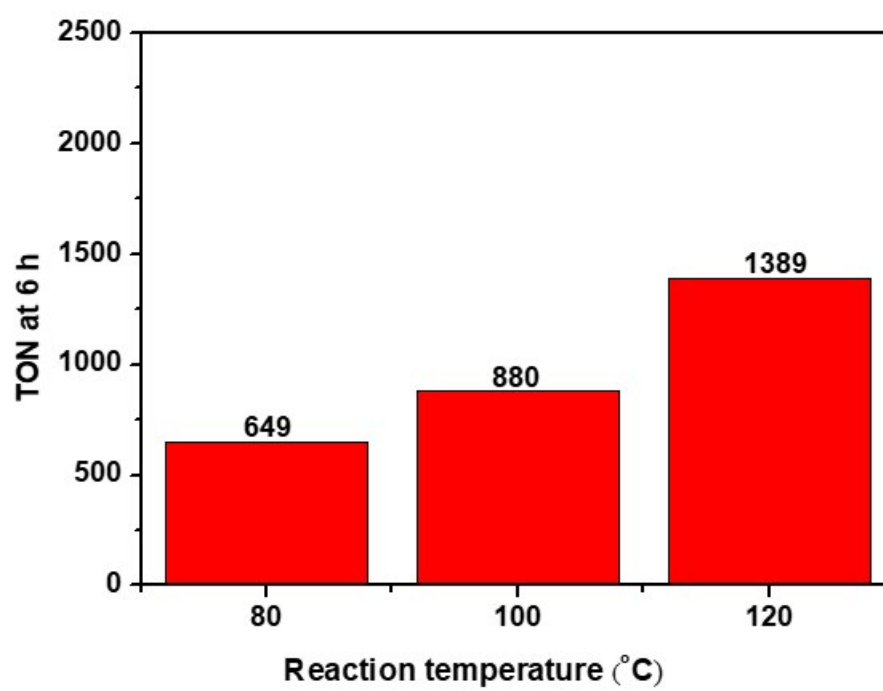

**Figure S10.** Effect of reaction temperature Reaction conditions: catalyst (10 mg), 1.0 M aqueous  $\text{NaHCO}_3$  solution (15 mL),  $\text{H}_2/\text{CO}_2$  (1:1), total 2.0 MPa, 6 h.

**Table S3.** The Pd contents of different molar ratio on PdAg alloy @ MHCS-TPOS catalysts as determined from ICP data.

| Sample                                  | Pd content [wt%] |
|-----------------------------------------|------------------|
| Pd <sub>1</sub> Ag <sub>9</sub> -P@MHCS | 1.15             |
| Pd <sub>2</sub> Ag <sub>8</sub> -P@MHCS | 0.95             |
| Pd <sub>3</sub> Ag <sub>7</sub> -P@MHCS | 1.08             |
| Pd <sub>4</sub> Ag <sub>6</sub> -P@MHCS | 1.02             |

**Table S4.** The N concentrations in the different content polymer of MHCS as determined by CHN elemental analysis.

| Sample    | N content [wt%] |
|-----------|-----------------|
| MHCS      | 1.88            |
| 0.5P@MHCS | 5.42            |
| P@MHCS    | 8.58            |
| 2P@MHCS   | 9.68            |

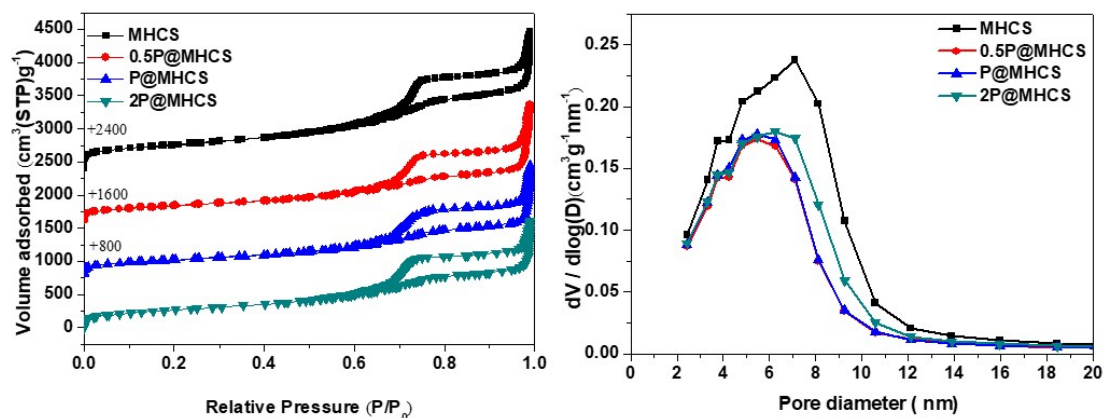

**Figure S11.** N<sub>2</sub> adsorption-desorption isotherms and mesopore size distribution of MHCS, 0.5P@MHCS, P@MHCS, 2P@MHCS.

**Table S5.** BET surface Area (S), Total Pore Volume (V<sub>p</sub>), Average Mesopore Diameter (Dave) of different Catalysts.

| catalysts | S <sub>BET</sub> [m <sup>2</sup> g <sup>-1</sup> ] | V <sub>p</sub> [cm <sup>3</sup> g <sup>-1</sup> ] | Dave [nm] |
|-----------|----------------------------------------------------|---------------------------------------------------|-----------|
| MHCS      | 1269                                               | 3.1                                               | 7.1       |
| 0.5P@MHCS | 857                                                | 1.4                                               | 5.5       |
| P@MHCS    | 814                                                | 1.4                                               | 5.5       |
| 2P@MHCS   | 764                                                | 1.3                                               | 5.7       |



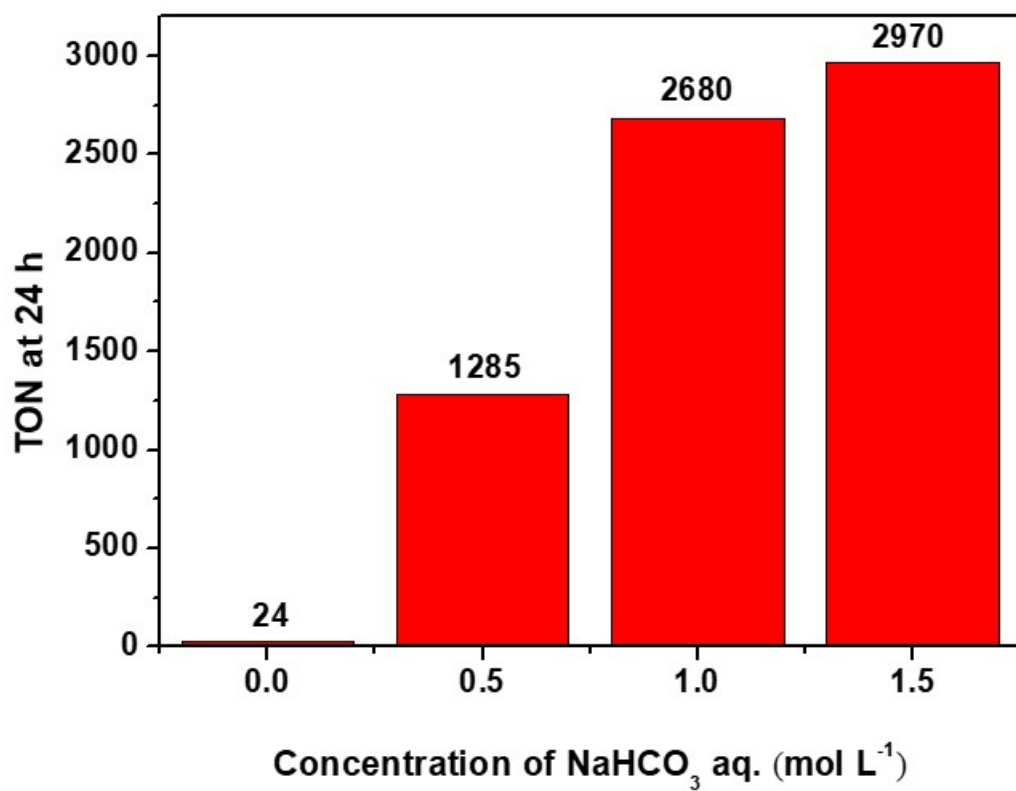

**Figure S12.** Effect of concentration of NaHCO<sub>3</sub> aqueous solution. Reaction conditions: 10 mg Pd<sub>2</sub>Ag<sub>8</sub>-P@MHCS, 1.0 M aqueous NaHCO<sub>3</sub> solution (15 mL), H<sub>2</sub>/CO<sub>2</sub> (1:1, total 2.0 MPa), 100 °C.

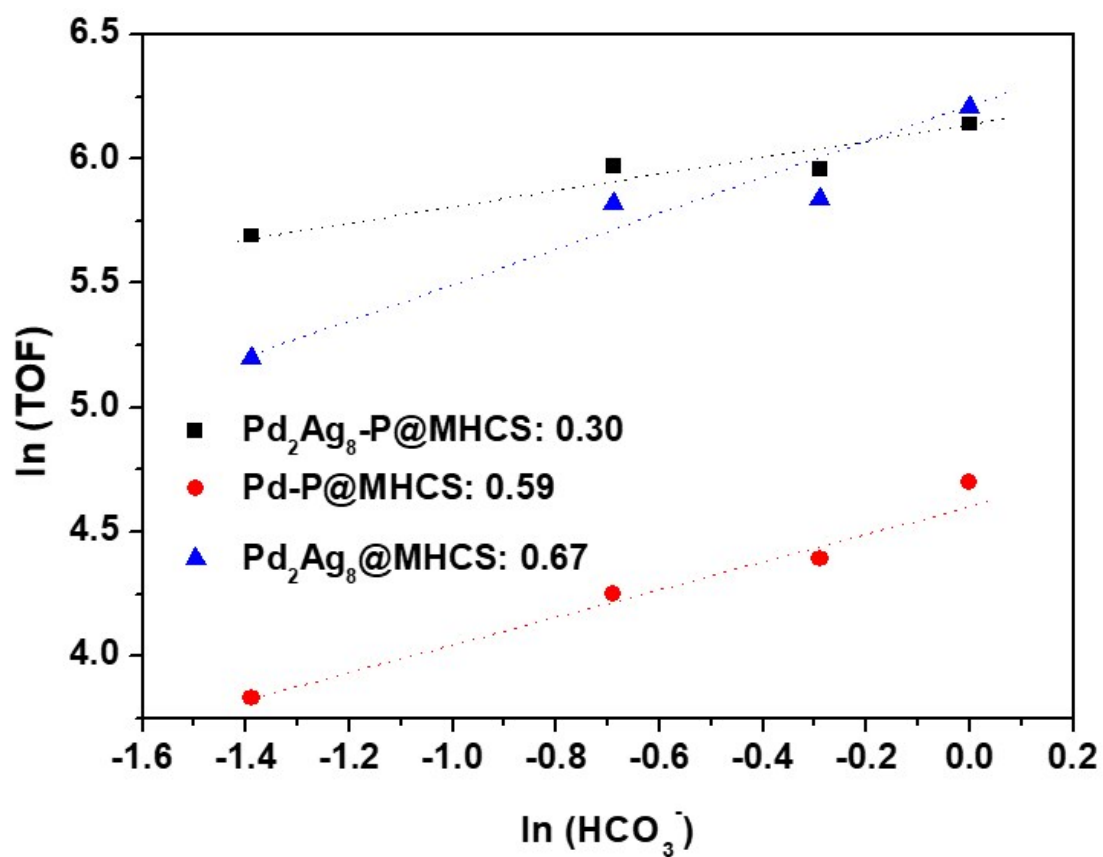

**Figure S13.** Effect of  $\text{HCO}_3^-$  concentration on TOF values using  $\text{Pd}_2\text{Ag}_8\text{-P@MHCS}$ ,  $\text{Pd-P@MHCS}$  and  $\text{Pd}_2\text{Ag}_8\text{@MHCS}$  catalysts. Reaction conditions: 10 mg catalyst, 0.25 M, 0.5 M, 0.75 M and 1.0 M aqueous  $\text{NaHCO}_3$  solution (15 mL),  $\text{H}_2/\text{CO}_2$  (1:1, total 2.0 MPa), 100 °C, 1 h.
